# Supplementary material
Source: MDPI journal article supplement (https://www.mdpi.com/2073-4441/13/12/1713)
Supplement: s1 [file s1]

# Current progress on marine microplastics pollution: A review on pollution occurrence, detection and environmental effects

Fei-fei Liu <sup>1,\*</sup>, Su-chun Wang <sup>1</sup>, Zhi-lin Zhu <sup>1</sup>, Guang-zhou Liu <sup>1</sup>

<sup>1</sup> Institute of Marine Science and Technology, Shandong University, Qingdao 266237, PR China; [liufeifei@sdu.edu.cn](mailto:liufeifei@sdu.edu.cn) (F.L.); [suchunw@163.com](mailto:suchunw@163.com) (S.W.); [zhuzhilinsdu@163.com](mailto:zhuzhilinsdu@163.com) (Z.Z.); [liuguangzhou@sdu.edu.cn](mailto:liuguangzhou@sdu.edu.cn) (G.L.)

\* Correspondence: [liufeifei@sdu.edu.cn](mailto:liufeifei@sdu.edu.cn)

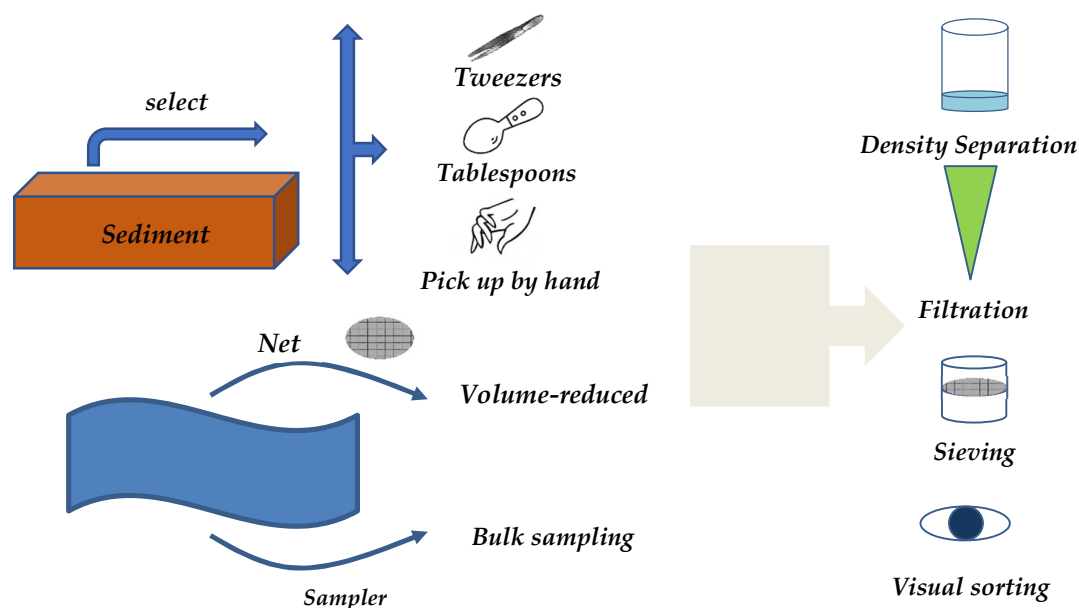

**Figure S1.** Sampling technologies and methods of processing.

**Table S1.** Advantages and disadvantages of the identification and quantification methods for microplastics.

| Method                          | Advantages                                                                                                                                                                                                               | Disadvantages                                                                                                                                                                               |
|---------------------------------|--------------------------------------------------------------------------------------------------------------------------------------------------------------------------------------------------------------------------|---------------------------------------------------------------------------------------------------------------------------------------------------------------------------------------------|
| Microscopy                      | <ul style="list-style-type: none"> <li>▪ Simple, fast, and easy</li> </ul>                                                                                                                                               | <ul style="list-style-type: none"> <li>▪ High possibility of false positive</li> <li>▪ High possibility of missing small and transparent plastic particles</li> </ul>                       |
| FTIR                            | <ul style="list-style-type: none"> <li>▪ Suitable for aliphatic compounds and polyesters</li> <li>▪ Short measurement time</li> </ul>                                                                                    | <ul style="list-style-type: none"> <li>▪ Very small particles (&lt;10 µm) are not detectable</li> <li>▪ Spectra quality depends on sample purity, particle size and thickness</li> </ul>    |
| Raman                           | <ul style="list-style-type: none"> <li>▪ Suitable for microplastics made of aliphatic, aromatic or C=C compounds</li> <li>▪ Detection of down to 1 µm microplastics in size</li> </ul>                                   | <ul style="list-style-type: none"> <li>▪ Long measurement time</li> <li>▪ Interference by sample purity and measurement parameters</li> </ul>                                               |
| Py-GC-MS                        | <ul style="list-style-type: none"> <li>▪ Simultaneously identify polymer types of microplastics particles and associated organic plastic additives</li> </ul>                                                            | <ul style="list-style-type: none"> <li>▪ Only a single particle can be analyzed in each run and not suitable for complex sample mixtures</li> <li>▪ A few polymer identification</li> </ul> |
| TGA-TDS-GC-MS                   | <ul style="list-style-type: none"> <li>▪ Allow the identification of high amount of environmental samples without any presorting or sample preparation</li> </ul>                                                        | <ul style="list-style-type: none"> <li>▪ Interference by TGA experiment conditions</li> </ul>                                                                                               |
| alkaline hydrolysis<br>LC-MS/MS | <ul style="list-style-type: none"> <li>▪ High recovery and analyzing efficiency</li> <li>▪ Separation of microplastics from the samples is unnecessary</li> <li>▪ Low loss of microplastics caused by picking</li> </ul> | <ul style="list-style-type: none"> <li>▪ Not suitable to quantify the different microplastics which contain the same building block compound</li> </ul>                                     |
